# Supplementary material for: At Least Ten Genes Define the Imprinted Dlk1-Dio3 Cluster on Mouse Chromosome 12qF1
Source: PLoS One. 2009 Feb 5;4(2):e4352. doi: 10.1371/journal.pone.0004352 (PMC2632752; doi:10.1371/journal.pone.0004352)
Supplement: Table S2 — Restriction site polymorphisms in cDNAs between 129S1 and CzechII/Ei (0.07 MB DOC) [file pone.0004352.s002.doc]

| Supplemental Table S2. Restriction site polymorphisms in cDNAs between 129S1 and CzechII/Ei | | | | |
| --- | --- | --- | --- | --- |
| Gene Name | Accession  Number | Region Investigated | Polymorphism (129Czech) | Restriction Enzyme  (129Czech) |
| AK050713 | AK050713 | 784-1213 | 993AG | No siteMscI |
| AK053394 | AK053394 | 1647-2100 | 1924CT | BslINo site |
| *Anti-peg11* | AK018276 | 477-1052 | 707CT | No siteNlaIII |
| *Asb4* | AK076004 | 1330-2045 | 1521TC | No siteSphI |
| *Cdkn1c* | AF160190 | 1076-2088 | 1684AG | No siteTfiI |
| *Grb10* | BC016111 | 1561-2643 | 2441CT  2467GA | No sitePstI  No siteAccI |
| H19 Fetal Liver RNA | NM_023123 | 1261-1662 | 1304Cdeleted  1631AG | No siteBsmA1  No siteBglI |
| *Igf2r* Exon 14 | L22109 | 1-106 | 41TC | BglIINo site |
| *Irm* | AK017440 | 941-1092 | 1046AT | No siteNlaIII |
| *Meg3/Gtl2* | Y13832 | 267-578 | 364TG | No siteAlw26I |
| *Meg8* | BF152417 | 119-295 | 234TC  283GA | DdeINo site  HgaINo site |
| *Meg9/Mirg* | AK013406 | 26-418 | 124AT  395+14bp Insertion | HpyCH4V No site  No SiteMboII |
| Delta-like homolog 1 (*Dlk1*) | D16847 | 470-817 | 692TC | DraIIINo site |
| *Dlk1* Alt. pA “DAT” | EU434917 | 1533-2044 | 1636GA | EcoO109INo site |
| *Dio3* | NM_172119 | 1216-1657 | 1332CG  1523CT | TaqINo site  TaqINo site |
| -Sarcoglycan (*Sgce*) | AF103877 | 140-1421 | 1232CT | No siteNlaIII |
| *Igf2* | NM_010514 | 929-1726 | 1225CT | DdeINo site |
| Necdin (*Ndn*) | NM_010882 | 643-781 | 704CA | SacIINo site |
| MyEF-3-like/*Peg10* | AF302691 | 1844-2197 | 1995TG | MseINo site |
| *Peg3* | AF038939 | 3860-4325 | 3982CG | No siteFauI |
| *Zac1* | AF147785 | 1474-3064 | 2351CT | No siteNsiI |
| *Slc25a29* | BC006711 | 466-1634 | 634TC | No siteBsp1286I |
| *Casd1* | BC018542 | 1008-1499 | 1435GC | DdeINo site |
| *Col1A2* | X58251 | 2304-4158 | 2788GC  3517AG  3838CA | No siteMspI  BsmAINo site  No siteBseGI |
| *Dync1h1* | AY004877 | 1706-2154 | 1790GA | No siteStuI |
| *RacGap1* | AB030252 | 1094-1725 | 1418CT | FspINo site |
| *Mpeg1* | L20315 | 330-1551 | 787TA  1108GA | No siteAlwNI  AluINo site |
| *Plac8* | AF263458 | 152-516 | 483TC | No siteTsp509I |
| *Postn* | NM_015784 | 1016-1517 | 1194AT  1398AC | Tsp509INo site  No siteAciI |
| *Ppp2r5c* | AB055635 | 740-1384 | 927GA | No siteTsp509I |
| Tryptophanyl tRNA synthetase (*Wars*) | BC003450 | 337-745 | 370GA | No siteTspRI |
| “Begain” Biallelic |  | 2017-2644 | 2282CT | No siteBstXI |
| “BC007953like” Biallelic |  | 767-1993 | 1683TC | No siteBsaAI |
| *Ppp1r9a* Biallelic |  | 5638-6330 | 3’ 388AG  3’ 665CT | No siteMspI  No siteAccI  RsaINo site |
| “ASDio3” |  | 5958-6437 | 5984CT | No siteBlpI |
| “Dio3AS” Biallelic |  | 4489-5190 | 4952AG | No siteMspI |
| Anti-Dio3 | BG088109 | 121-232 | 198TC | LweINo site |
